# Supplementary material
Source: PubMed Central journal article supplement (PMC5193104)
Supplement: NIHMS805466-supplement-Supplemental_Material.pdf [file NIHMS805466-supplement-Supplemental_Material.pdf]

## **SUPPLEMENTAL MATERIAL**

### **Smoking and Cardiac Structure and Function in the Elderly: The Atherosclerosis Risk in Communities (ARIC) Study**

Wilson Nadruz Junior, Brian Claggett, Alexandra Gonçalves, Gabriela Querejeta Roca,  
Miguel M. Fernandes-Silva, Amil M. Shah, Susan Cheng, Hirofumi Tanaka, Gerardo Heiss,  
Dalane W. Kitzman, Scott D. Solomon

Supplemental Tables

Supplemental Table 1. Echocardiographic morphological characteristics of the participants according to smoking status adjusted for attrition by inverse probability weighting.

| Smoking status                  | Model 1       |               |               | Model 2       |               |               |
|---------------------------------|---------------|---------------|---------------|---------------|---------------|---------------|
|                                 | Never         | Former        | Current       | Never         | Former        | Current       |
| LV end diastolic diameter, cm   | 4.36 ± 0.01   | 4.36 ± 0.01   | 4.33 ± 0.03   | 4.34 ± 0.01   | 4.34 ± 0.01   | 4.37 ± 0.03   |
| LV end systolic diameter, cm    | 2.57 ± 0.01   | 2.58 ± 0.01   | 2.55 ± 0.03   | 2.56 ± 0.01   | 2.58 ± 0.01   | 2.58 ± 0.03   |
| LV Posterior wall thickness, mm | 9.3 ± 0.03    | 9.3 ± 0.03    | 9.3 ± 0.10    | 9.2 ± 0.03    | 9.2 ± 0.03    | 9.3 ± 0.10    |
| Septal wall thickness, mm       | 10.4 ± 0.04   | 10.4 ± 0.04   | 10.5 ± 0.11   | 10.3 ± 0.04   | 10.3 ± 0.03   | 10.6 ± 0.11*‡ |
| LV EDV, mL                      | 80.3 ± 0.4    | 79.7 ± 0.4    | 77.2 ± 1.2*   | 79.7 ± 0.4    | 79.4 ± 0.4    | 78.1 ± 1.1    |
| LV mass, g                      | 145 ± 1       | 145 ± 1       | 145 ± 3       | 142 ± 1       | 143 ± 1       | 148 ± 3*      |
| LV mass index, g/m <sup>2</sup> | 78.1 ± 0.4    | 77.6 ± 0.4    | 80.4 ± 1.1‡   | 77.1 ± 0.4    | 77.2 ± 0.4    | 80.6 ± 1.3*‡  |
| LV mass/EDV ratio, g/mL         | 1.86 ± 0.01   | 1.88 ± 0.01   | 1.93 ± 0.03   | 1.85 ± 0.01   | 1.86 ± 0.01   | 1.95 ± 0.03†‡ |
| Relative wall thickness         | 0.430 ± 0.002 | 0.430 ± 0.002 | 0.432 ± 0.005 | 0.428 ± 0.002 | 0.429 ± 0.002 | 0.430 ± 0.005 |
| LV hypertrophy, %               | 11            | 10            | 15‡           | 10            | 10            | 16*‡          |
| LV concentric hypertrophy, %    | 7             | 6             | 10‡           | 6             | 6             | 10‡           |
| LV eccentric hypertrophy, %     | 4             | 4             | 5             | 4             | 4             | 6             |

|                                        |            |            |                          |            |            |            |
|----------------------------------------|------------|------------|--------------------------|------------|------------|------------|
| LV concentric remodeling, %            | 40         | 42         | 37                       | 40         | 43         | 36         |
| LV normal geometry, %                  | 49         | 48         | 48                       | 50         | 47         | 48         |
| LA volume index, mL/m <sup>2</sup>     | 25.6 ± 0.2 | 25.8 ± 0.2 | 24.8 ± 0.4 <sup>‡</sup>  | 25.5 ± 0.2 | 25.7 ± 0.2 | 25.0 ± 0.4 |
| RV end diastolic area, cm <sup>2</sup> | 19.4 ± 0.1 | 19.4 ± 0.1 | 18.8 ± 0.3* <sup>‡</sup> | 19.3 ± 0.1 | 19.3 ± 0.1 | 19.1 ± 0.3 |
| RV end systolic area, cm <sup>2</sup>  | 9.2 ± 0.1  | 9.2 ± 0.1  | 8.8 ± 0.2* <sup>‡</sup>  | 9.1 ± 0.1  | 9.1 ± 0.1  | 9.0 ± 0.2  |

---

**Legend.** Continuous variables are presented as mean ± standard error. \* p<0.05 and † p<0.01 vs. never smokers and ‡ p<0.05 vs. former smokers. LV – left ventricular; EDV – end-diastolic volume; LA – left atrial; RV – right ventricular.

Model 1: Adjusted for age, sex and race

Model 2: Further adjusted for body mass index, diabetes, anti-hypertensive medications, systolic blood pressure, current alcohol consumption, heart rate and carotid-femoral pulse wave velocity.

Supplemental Table 2. Echocardiographic functional characteristics of the participants according to smoking status adjusted for attrition by inverse probability weighting.

| Smoking status                    | Model 1     |              |              | Model 2     |             |              |
|-----------------------------------|-------------|--------------|--------------|-------------|-------------|--------------|
|                                   | Never       | Former       | Current      | Never       | Former      | Current      |
| E/A ratio                         | 0.83 ± 0.01 | 0.84 ± 0.01  | 0.86 ± 0.02  | 0.84 ± 0.01 | 0.83 ± 0.01 | 0.86 ± 0.02  |
| E/E' ratio                        | 11.3 ± 0.1  | 11.4 ± 0.1   | 11.9 ± 0.2*‡ | 11.2 ± 0.1  | 11.2 ± 0.1  | 12.0 ± 0.3†§ |
| Global longitudinal LV strain (%) | -18.1 ± 0.1 | -17.9 ± 0.1* | -17.9 ± 0.2  | -18.1 ± 0.1 | -18.0 ± 0.1 | -18.0 ± 0.2  |
| LV ejection fraction (%)          | 65.8 ± 0.1  | 65.6 ± 0.1   | 66.7 ± 0.4*§ | 65.8 ± 0.1  | 65.7 ± 0.1  | 66.7 ± 0.4*‡ |
| RV fractional area change (%)     | 52.6 ± 0.2  | 52.6 ± 0.2   | 52.9 ± 0.6   | 52.6 ± 0.2  | 52.8 ± 0.2  | 53.1 ± 0.5   |
| Tricuspid annulus PSV (cm/s)      | 12.0 ± 0.1  | 11.9 ± 0.1   | 11.7 ± 0.2   | 12.0 ± 0.1  | 11.9 ± 0.1  | 11.7 ± 0.2   |

**Legend.** Continuous variables are presented as mean ± standard error. \* p<0.05 and † p<0.01 vs. never smokers and ‡ p<0.05 and § p<0.01 vs. former smokers. LV – left ventricular; E/A – early to late transmitral inflow velocity ratio; E/E' - early transmitral inflow to early mitral relaxation velocity ratio; RV – right ventricular; PSV – peak-systolic velocity.

Model 1: Adjusted for age, sex and race

Model 2: Further adjusted for body mass index, diabetes, anti-hypertensive medications, systolic blood pressure, current alcohol consumption, heart rate and carotid-femoral pulse wave velocity
